# Supplementary material for: New Lactones Produced by Streptomyces sp. SN5431 and Their Antifungal Activity against Bipolaris maydis
Source: MDPI journal article supplement (doi:10.3390/microorganisms11030616), 2023-02-28

# Support information

## New Lactones Produced by *Streptomyces* sp. SN5431 and Their Antifungal Activity against *Bipolaris maydis*

Yinan Wang <sup>1</sup>, Di Yang <sup>1</sup> and Zhiguo Yu <sup>1,2,\*</sup>

<sup>1</sup> College of Plant Protection, Shenyang Agricultural University,  
Shenyang 110866, China

<sup>2</sup> Engineering & Technological Research Center of Biopesticide for Liaoning  
Province, Shenyang 110866, China

\* Correspondence: zyu@syau.edu.cn; Tel.: +86-24-88487148

### Contents

|                                                                                                                      |    |
|----------------------------------------------------------------------------------------------------------------------|----|
| Figure S1. The <sup>1</sup> H-NMR spectrum of Tiuslactone A, <b>1</b> , in CDCL <sub>3</sub> .....                   | 1  |
| Figure S2. The <sup>13</sup> C-NMR spectrum of Tiuslactone A, <b>1</b> , in CDCL <sub>3</sub> .....                  | 1  |
| Figure S3. The HSQC spectrum of Tiuslactone A, <b>1</b> , in CDCL <sub>3</sub> .....                                 | 2  |
| Figure S4. The HMBC spectrum of Tiuslactone A, <b>1</b> , in CDCL <sub>3</sub> .....                                 | 2  |
| Figure S5. The <sup>1</sup> H- <sup>1</sup> H COSY spectrum of Tiuslactone A, <b>1</b> , in CDCL <sub>3</sub> .....  | 3  |
| Figure S6. The NOESY spectrum of Tiuslactone A, <b>1</b> , in CDCL <sub>3</sub> .....                                | 3  |
| Figure S7. The HRESIMS spectrum of Tiuslactone A, <b>1</b> .....                                                     | 4  |
| Figure S8. The <sup>1</sup> H-NMR spectrum of Tiuslactone B, <b>2</b> , in CDCL <sub>3</sub> .....                   | 4  |
| Figure S9. The <sup>13</sup> C-NMR spectrum of Tiuslactone B, <b>2</b> , in CDCL <sub>3</sub> .....                  | 5  |
| Figure S10. The HSQC spectrum of Tiuslactone B, <b>2</b> , in CDCL <sub>3</sub> .....                                | 5  |
| Figure S11. The HMBC spectrum of Tiuslactone B, <b>2</b> , in CDCL <sub>3</sub> .....                                | 6  |
| Figure S12. The <sup>1</sup> H- <sup>1</sup> H COSY spectrum of Tiuslactone B, <b>2</b> , in CDCL <sub>3</sub> ..... | 6  |
| Figure S13. The NOESY spectrum of Tiuslactone B, <b>2</b> , in CDCL <sub>3</sub> .....                               | 7  |
| Figure S14. The HRESIMS spectrum of Tiuslactone B, <b>2</b> .....                                                    | 7  |
| Figure S15. The <sup>1</sup> H-NMR spectrum of Tiuslactone C, <b>3</b> , in CDCL <sub>3</sub> .....                  | 8  |
| Figure S16. The <sup>13</sup> C-NMR spectrum of Tiuslactone C, <b>3</b> , in CDCL <sub>3</sub> .....                 | 8  |
| Figure S17. The HSQC spectrum of Tiuslactone C, <b>3</b> , in CDCL <sub>3</sub> .....                                | 9  |
| Figure S18. The HMBC spectrum of Tiuslactone C, <b>3</b> , in CDCL <sub>3</sub> .....                                | 9  |
| Figure S19. The <sup>1</sup> H- <sup>1</sup> H COSY spectrum of Tiuslactone C, <b>3</b> , in CDCL <sub>3</sub> ..... | 10 |
| Figure S20. The HRESIMS spectrum of Tiuslactone C, <b>3</b> .....                                                    | 10 |

|                                                                                                                        |    |
|------------------------------------------------------------------------------------------------------------------------|----|
| <b>Figure S21.</b> The $^1\text{H}$ -NMR spectrum of Tiuslactone D, <b>4</b> , in $\text{CDCl}_3$ .....                | 11 |
| <b>Figure S22.</b> The $^{13}\text{C}$ -NMR spectrum of Tiuslactone D, <b>4</b> , in $\text{CDCl}_3$ .....             | 11 |
| <b>Figure S23.</b> The HSQC spectrum of Tiuslactone D, <b>4</b> , in $\text{CDCl}_3$ .....                             | 12 |
| <b>Figure S24.</b> The HMBC spectrum of Tiuslactone D, <b>4</b> , in $\text{CDCl}_3$ .....                             | 12 |
| <b>Figure S25.</b> The $^1\text{H}$ - $^1\text{H}$ COSY spectrum of Tiuslactone D, <b>4</b> , in $\text{CDCl}_3$ ..... | 13 |
| <b>Figure S26.</b> The NOESY spectrum of Tiuslactone D, <b>4</b> , in $\text{CDCl}_3$ .....                            | 13 |
| <b>Figure S27.</b> The HRESIMS spectrum of Tiuslactone D, <b>4</b> .....                                               | 14 |
| <b>Figure S28.</b> The $^1\text{H}$ -NMR spectrum of Tiuslactone E, <b>5</b> , in $\text{CDCl}_3$ .....                | 14 |
| <b>Figure S29.</b> The $^{13}\text{C}$ -NMR spectrum of Tiuslactone E, <b>5</b> , in $\text{CDCl}_3$ .....             | 15 |
| <b>Figure S30.</b> The HSQC spectrum of Tiuslactone E, <b>5</b> , in $\text{CDCl}_3$ .....                             | 15 |
| <b>Figure S31.</b> The HMBC spectrum of Tiuslactone E, <b>5</b> , in $\text{CDCl}_3$ .....                             | 16 |
| <b>Figure S32.</b> The $^1\text{H}$ - $^1\text{H}$ COSY spectrum of Tiuslactone E, <b>5</b> , in $\text{CDCl}_3$ ..... | 16 |
| <b>Figure S33.</b> The NOESY spectrum of Tiuslactone E, <b>5</b> , in $\text{CDCl}_3$ .....                            | 17 |
| <b>Figure S34.</b> The HRESIMS spectrum of Tiuslactone E, <b>5</b> .....                                               | 17 |
| <b>Figure S35.</b> The $^1\text{H}$ -NMR spectrum of Tiuslactone F, <b>6</b> , in $\text{CDCl}_3$ .....                | 18 |
| <b>Figure S36.</b> The $^{13}\text{C}$ -NMR spectrum of Tiuslactone F, <b>6</b> , in $\text{CDCl}_3$ .....             | 18 |
| <b>Figure S37.</b> The HSQC spectrum of Tiuslactone F, <b>6</b> , in $\text{CDCl}_3$ .....                             | 19 |
| <b>Figure S38.</b> The HMBC spectrum of Tiuslactone F, <b>6</b> , in $\text{CDCl}_3$ .....                             | 19 |
| <b>Figure S39.</b> The $^1\text{H}$ - $^1\text{H}$ COSY spectrum of Tiuslactone F, <b>6</b> , in $\text{CDCl}_3$ ..... | 20 |
| <b>Figure S40.</b> The NOESY spectrum of Tiuslactone F, <b>6</b> , in $\text{CDCl}_3$ .....                            | 20 |
| <b>Figure S41.</b> The HRESIMS spectrum of Tiuslactone F, <b>6</b> .....                                               | 21 |

Chemical structure of compound 10 is shown in the top left corner. The  $^{13}\text{C}$  NMR spectrum displays peaks corresponding to the structure, with the following chemical shifts (ppm) labeled above the peaks:

- 176.3215
- 165.2767
- 145.6551
- 138.0089
- 127.6667
- 122.2461
- 67.7346
- 67.5449
- 61.2657
- 61.0493
- 57.7344
- 38.9083
- 17.8783

**Figure S3.** The HSQC spectrum of Tiuslactone A, **1**, in CDCL<sub>3</sub>

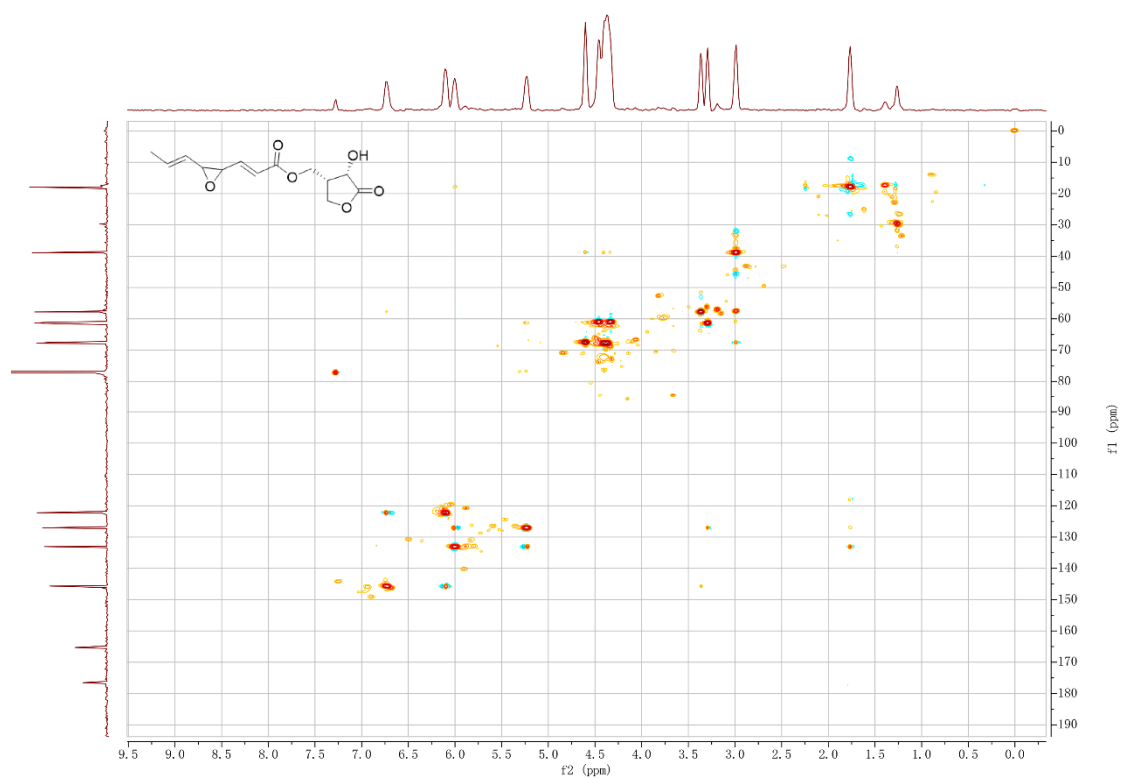

**Figure S4.** The HMBC spectrum of Tiuslactone A, **1**, in CDCL<sub>3</sub>

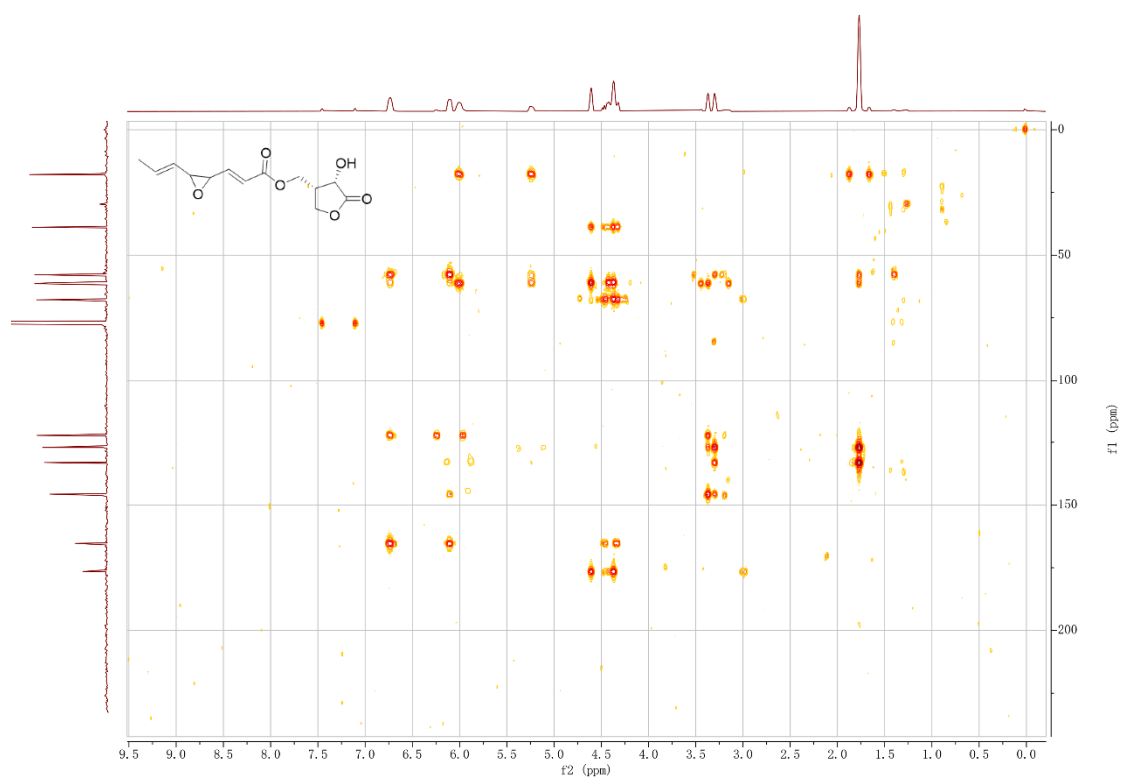

**Figure S5.** The  $^1\text{H}$ - $^1\text{H}$  COSY spectrum of Tiuslactone A, **1**, in  $\text{CDCl}_3$

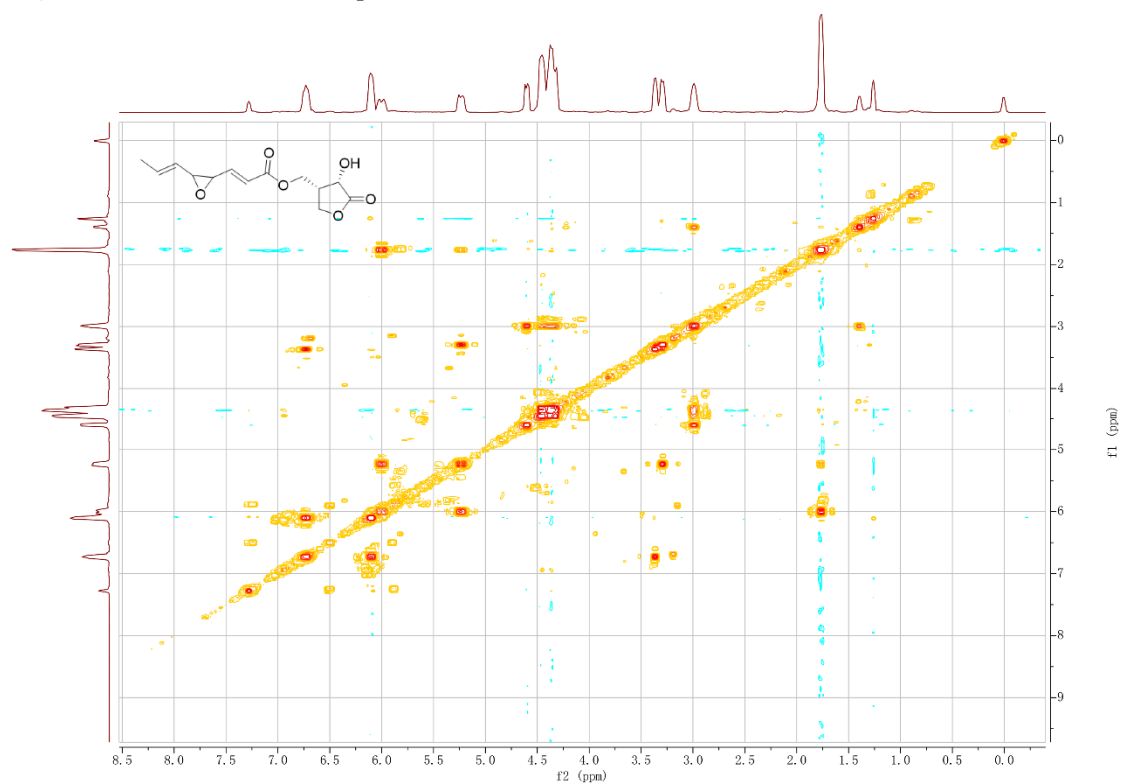

**Figure S6.** The NOESY spectrum of Tiuslactone A, **1**, in  $\text{CDCl}_3$

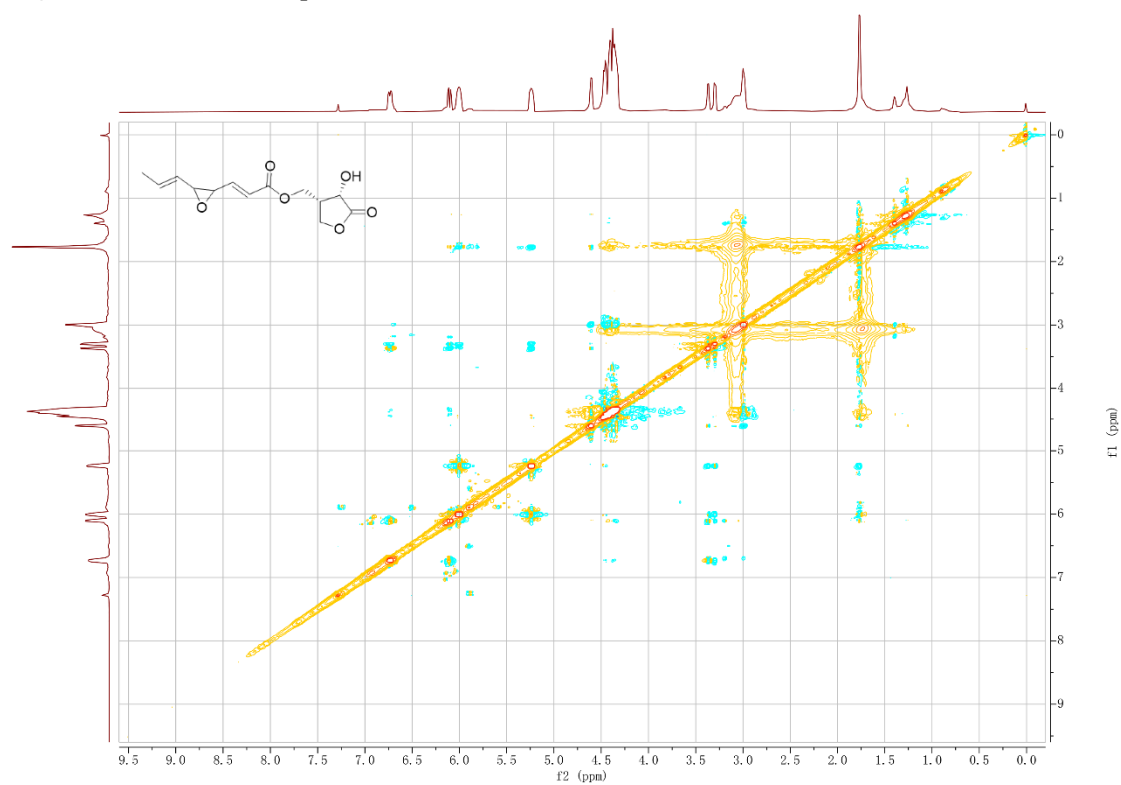

**Figure S7.** The HRESIMS spectrum of Tiuslactone A, **1**

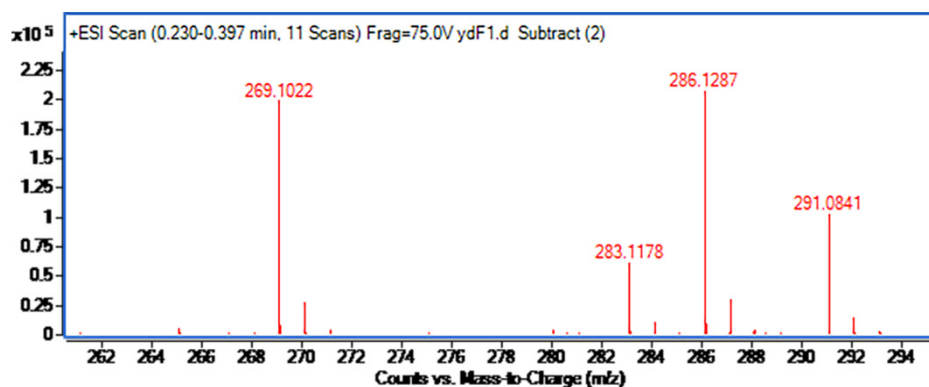

**Figure S8.** The  $^1\text{H}$ -NMR spectrum of Tiuslactone B, **2**, in  $\text{CDCl}_3$

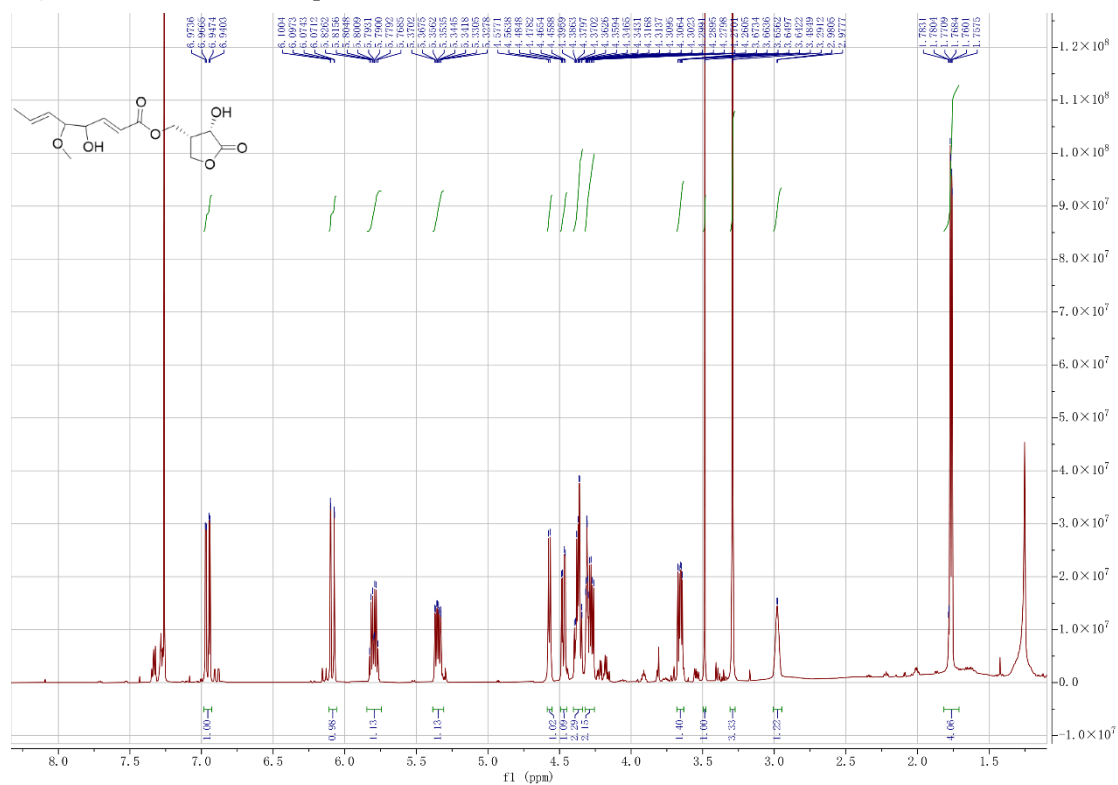

**Figure S9.** The  $^{13}\text{C}$ -NMR spectrum of Tiuslactone B, **2**, in  $\text{CDCl}_3$

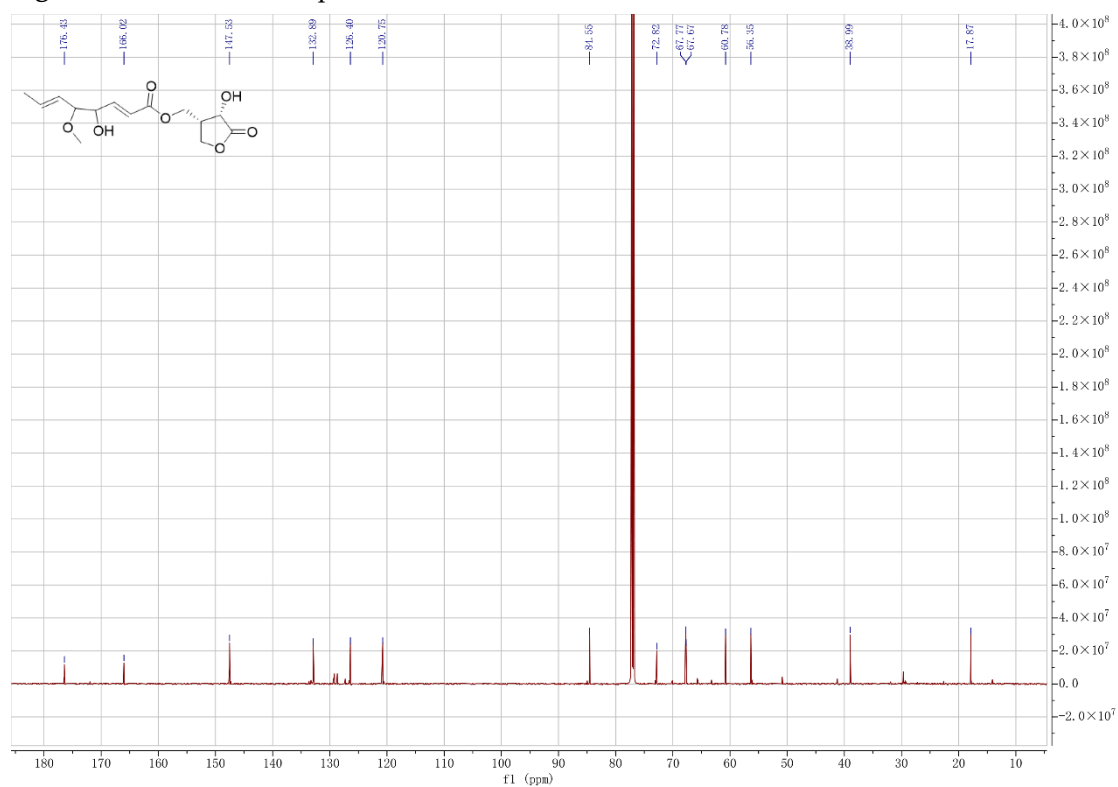

**Figure S10.** The HSQC spectrum of Tiuslactone B, **2**, in  $\text{CDCl}_3$

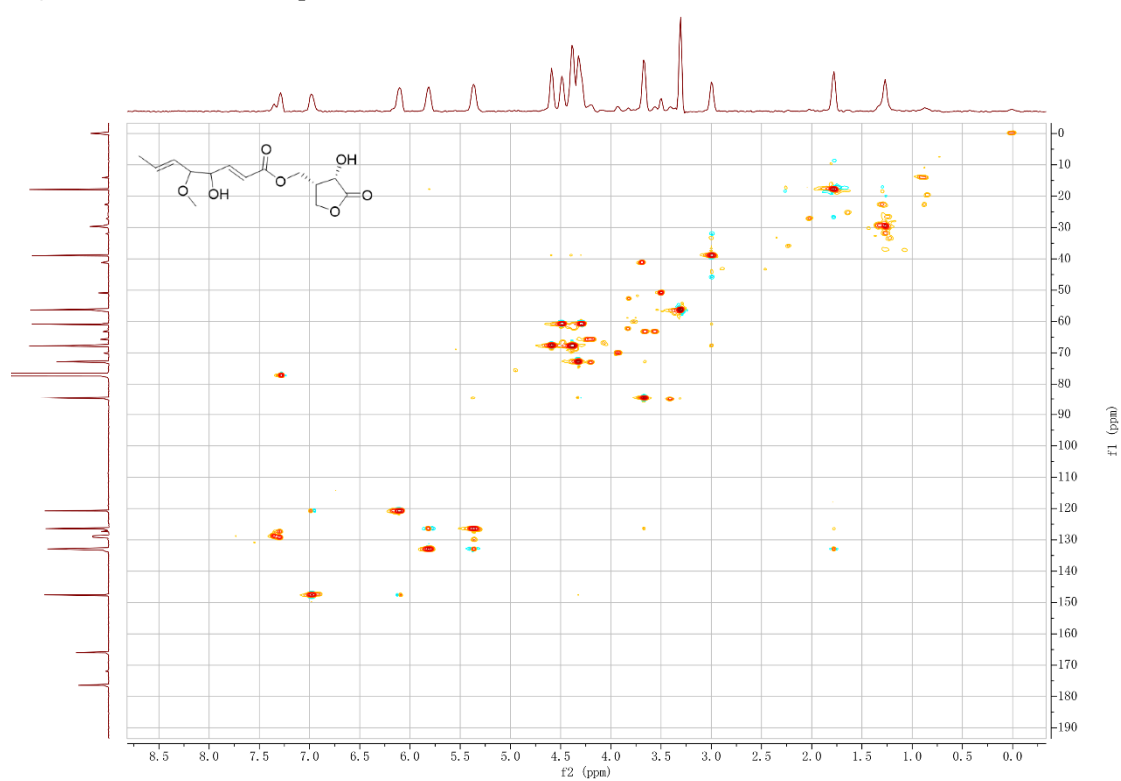

**Figure S11.** The HMBC spectrum of Tiuslactone B, **2**, in CDCl<sub>3</sub>

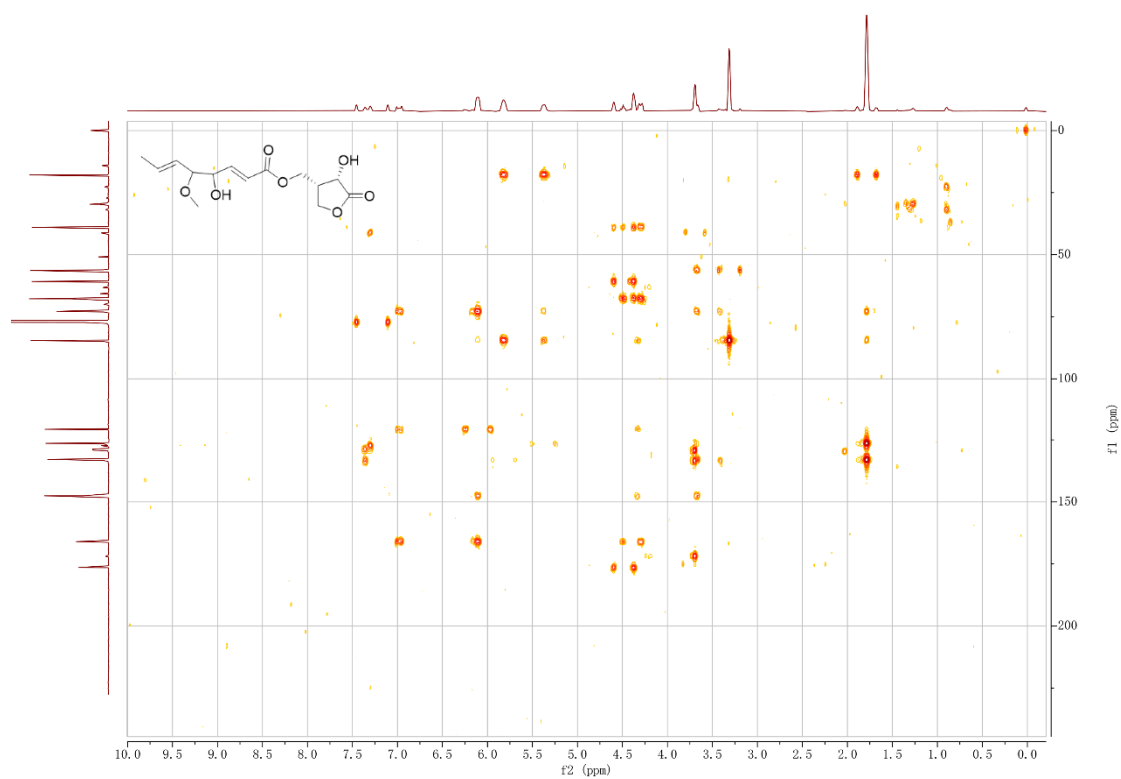

**Figure S12.** The <sup>1</sup>H-<sup>1</sup>H COSY spectrum of Tiuslactone B, **2**, in CDCl<sub>3</sub>

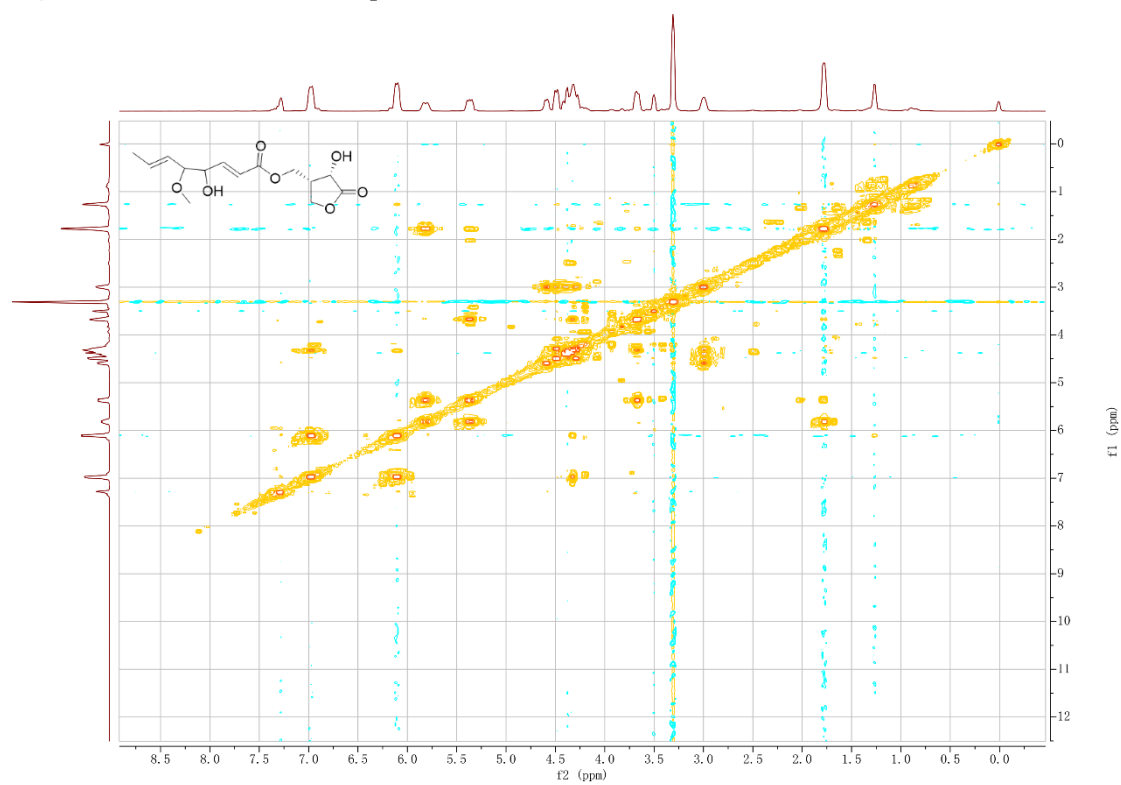



**Figure S13.** The NOESY spectrum of Tiuslactone B, **2**, in CDCL<sub>3</sub>

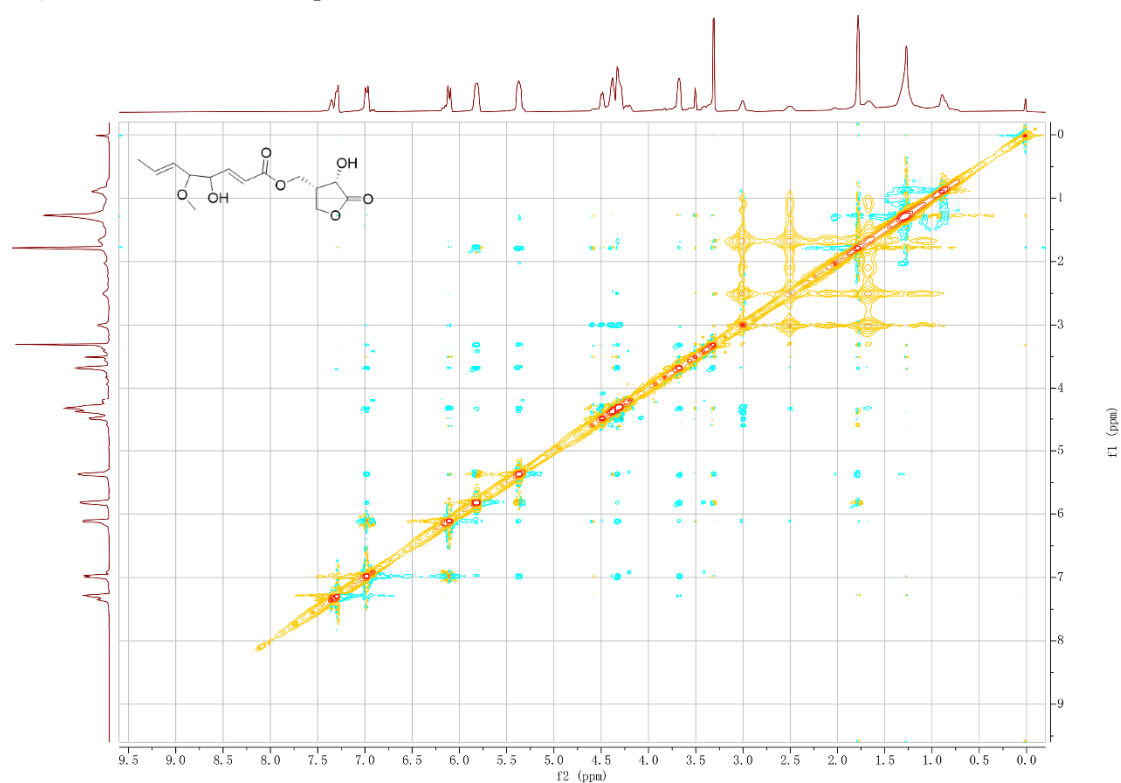

**Figure S14.** The HRESIMS spectrum of Tiuslactone B, **2**

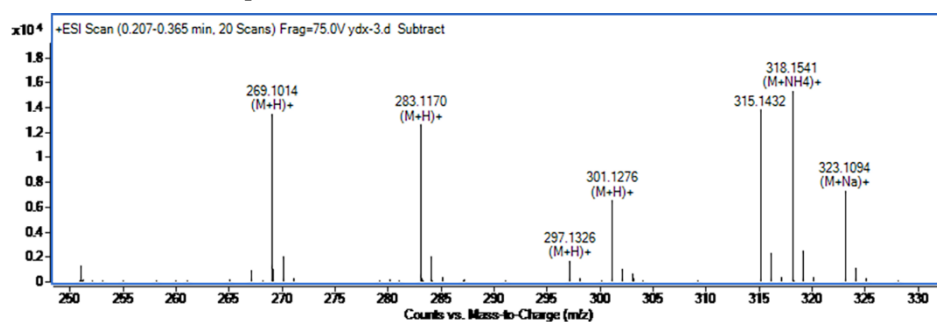

**Figure S15.** The  $^1\text{H}$ -NMR spectrum of Tiuslactone C, **3**, in  $\text{CDCl}_3$

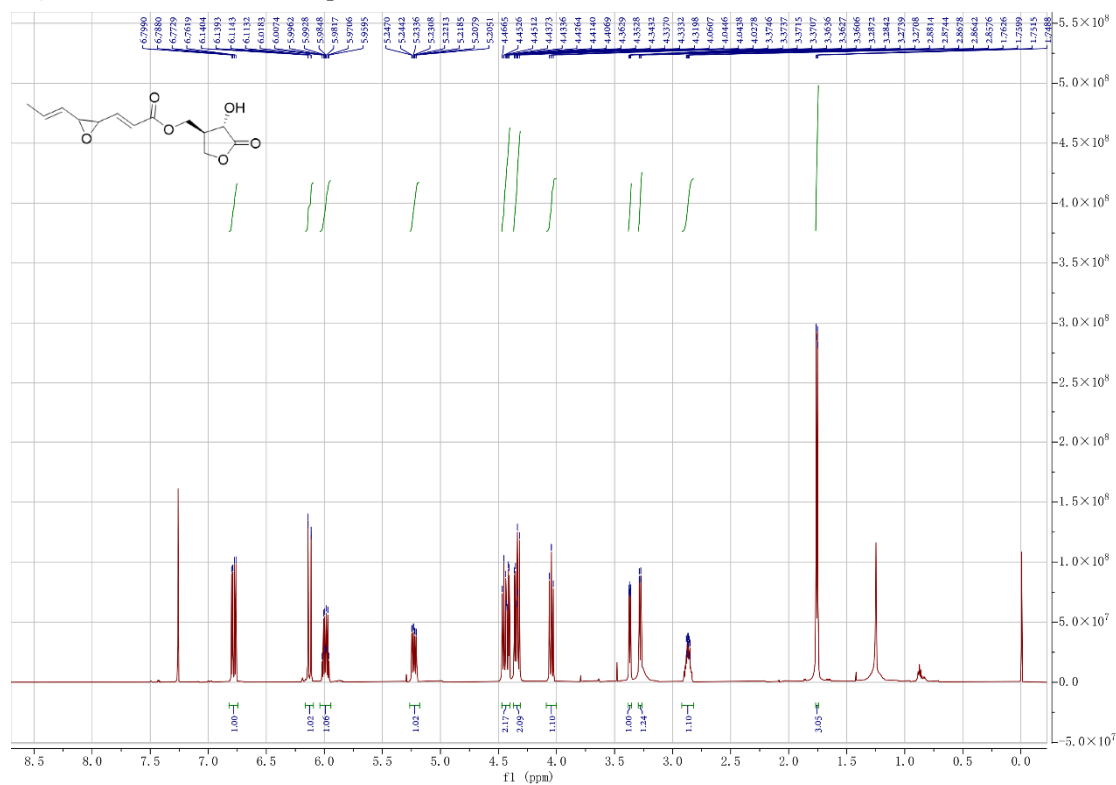

**Figure S16.** The  $^{13}\text{C}$ -NMR spectrum of Tiuslactone C, **3**, in  $\text{CDCl}_3$

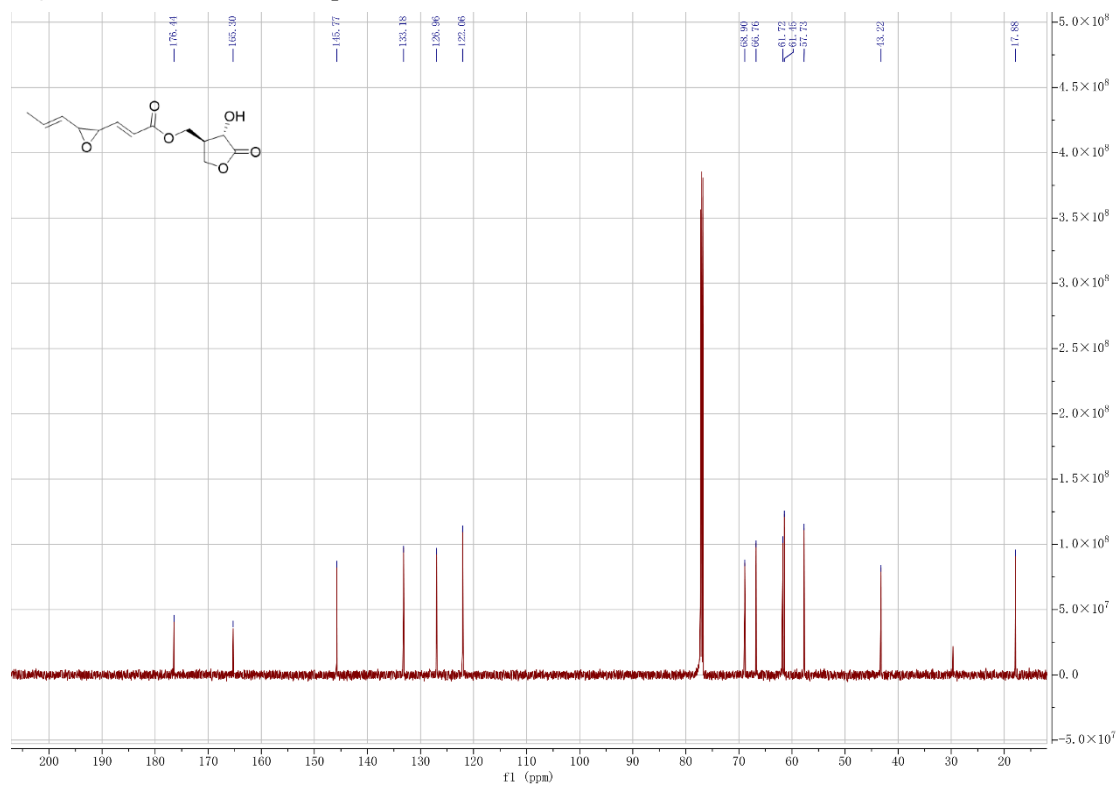

**Figure S17.** The HSQC spectrum of Tiuslactone C, **3**, in CDCL<sub>3</sub>

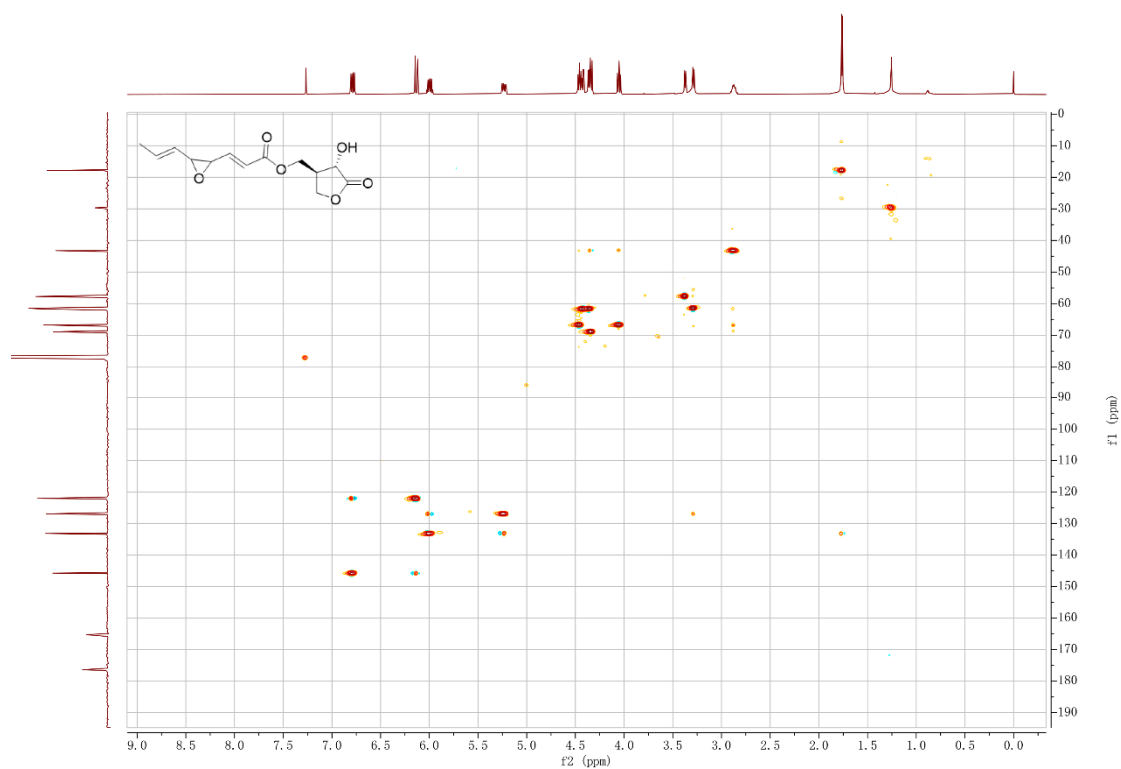

**Figure S18.** The HMBC spectrum of Tiuslactone C, **3**, in CDCL<sub>3</sub>

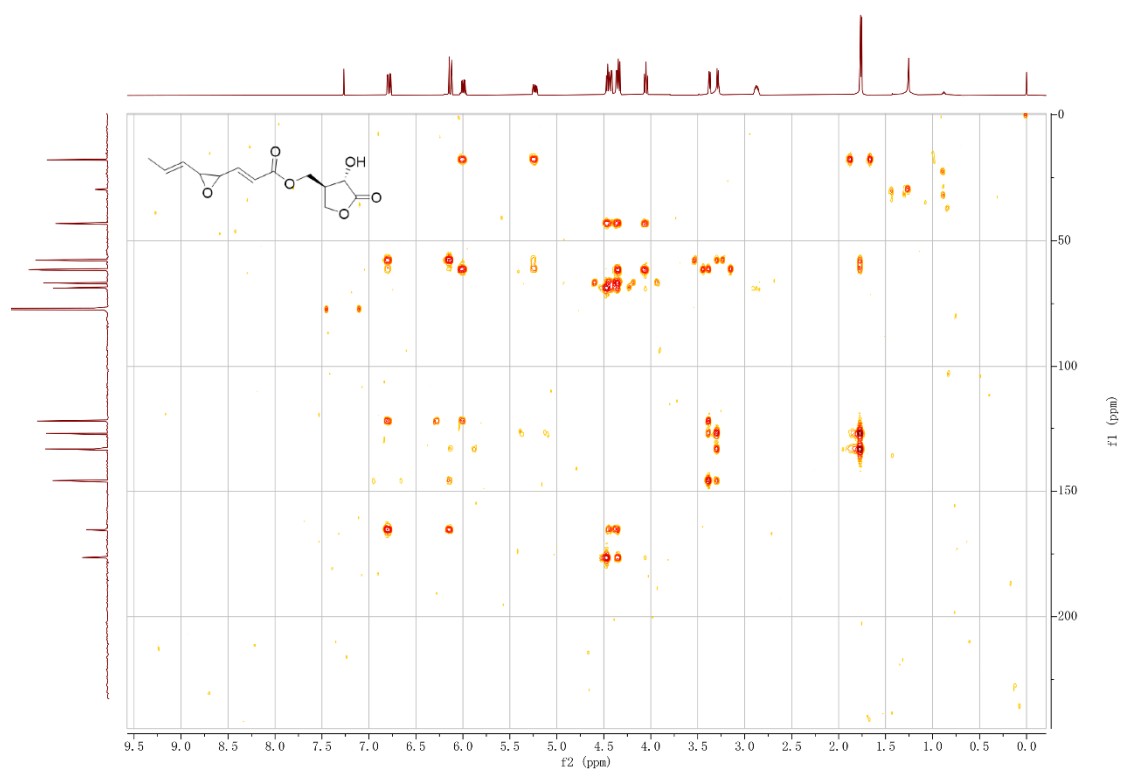

**Figure S19.** The  $^1\text{H}$ - $^1\text{H}$  COSY spectrum of Tiuslactone C, **3**, in  $\text{CDCl}_3$

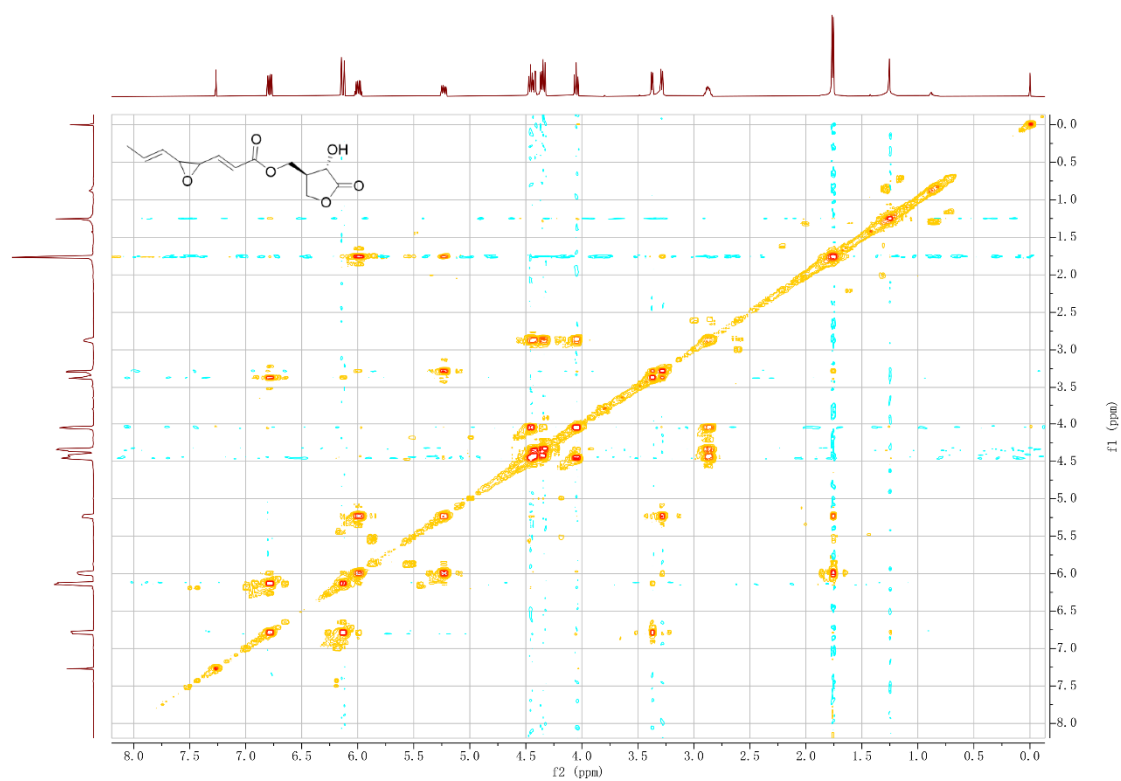

**Figure S20.** The HRESIMS spectrum of Tiuslactone C, **3**

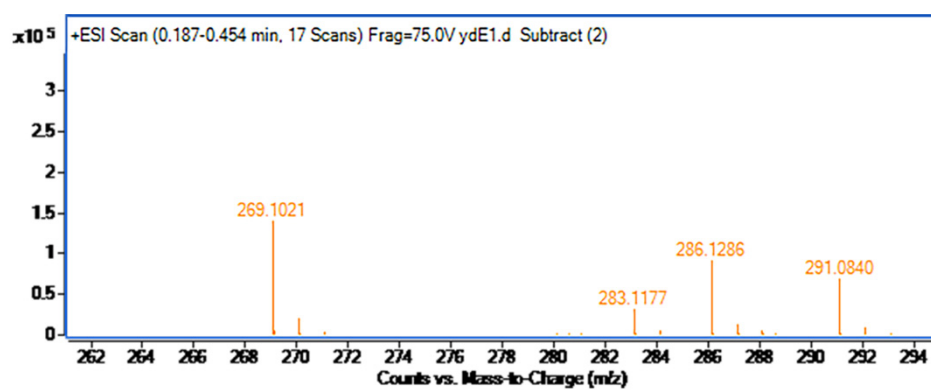

**Figure S21.** The  $^1\text{H}$ -NMR spectrum of Tiuslactone D, **4**, in  $\text{CDCl}_3$

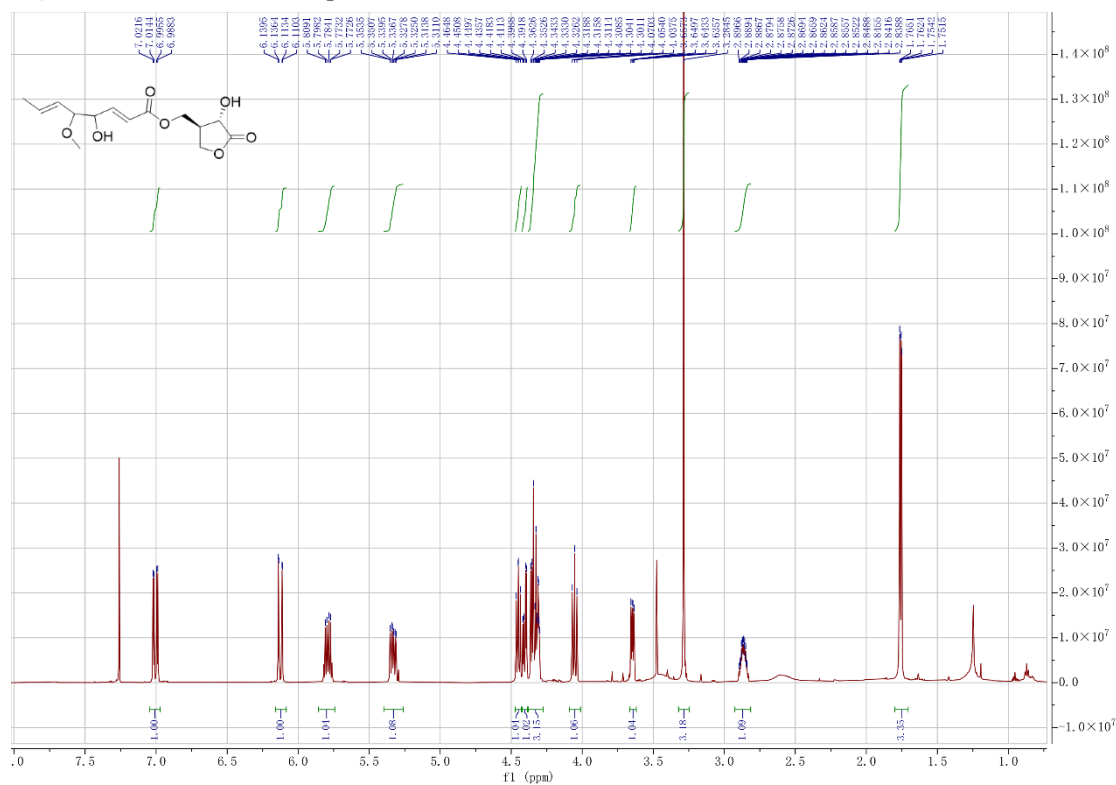

**Figure S23.** The HSQC spectrum of Tiuslactone D, **4**, in CDCL<sub>3</sub>

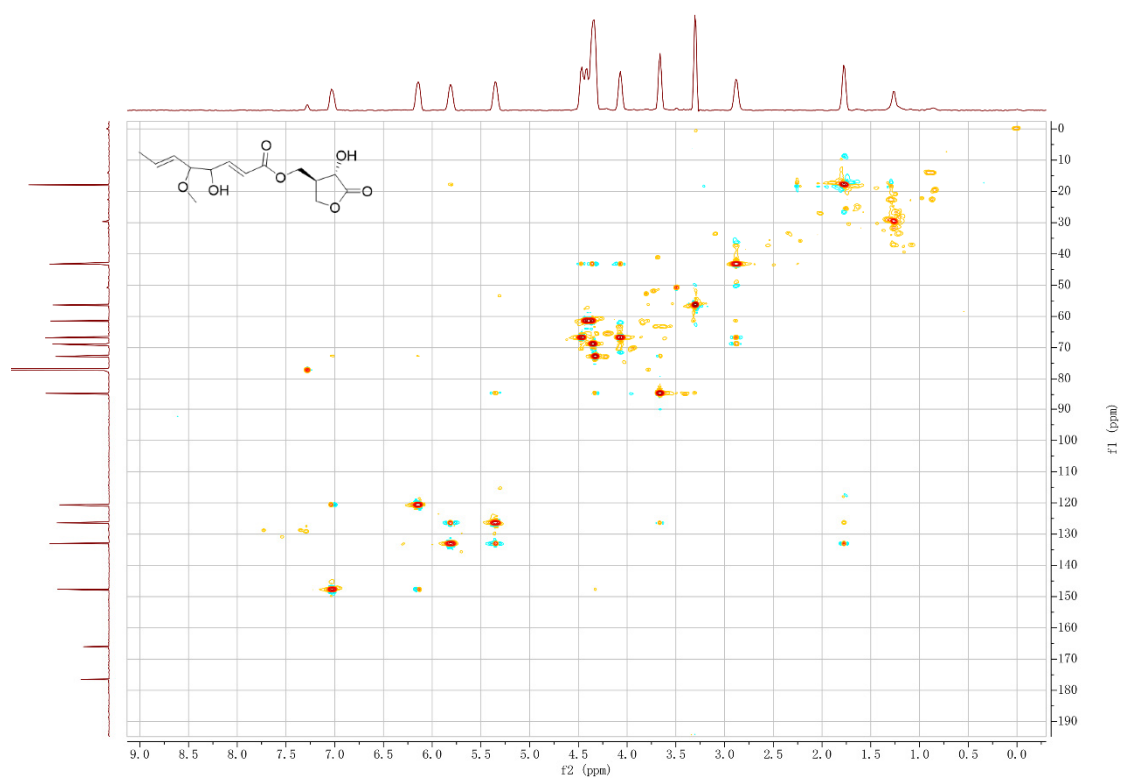

**Figure S24.** The HMBC spectrum of Tiuslactone D, **4**, in CDCL<sub>3</sub>

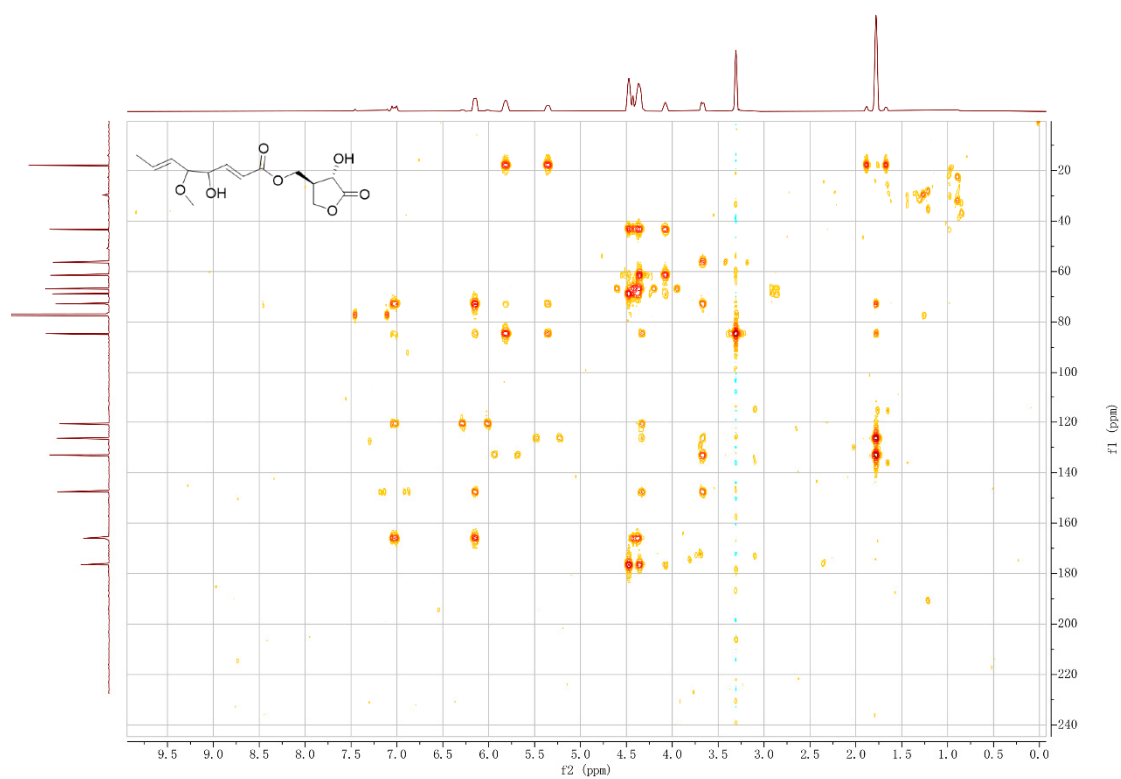

**Figure S25.** The  $^1\text{H}$ - $^1\text{H}$  COSY spectrum of Tiuslactone D, **4**, in  $\text{CDCl}_3$

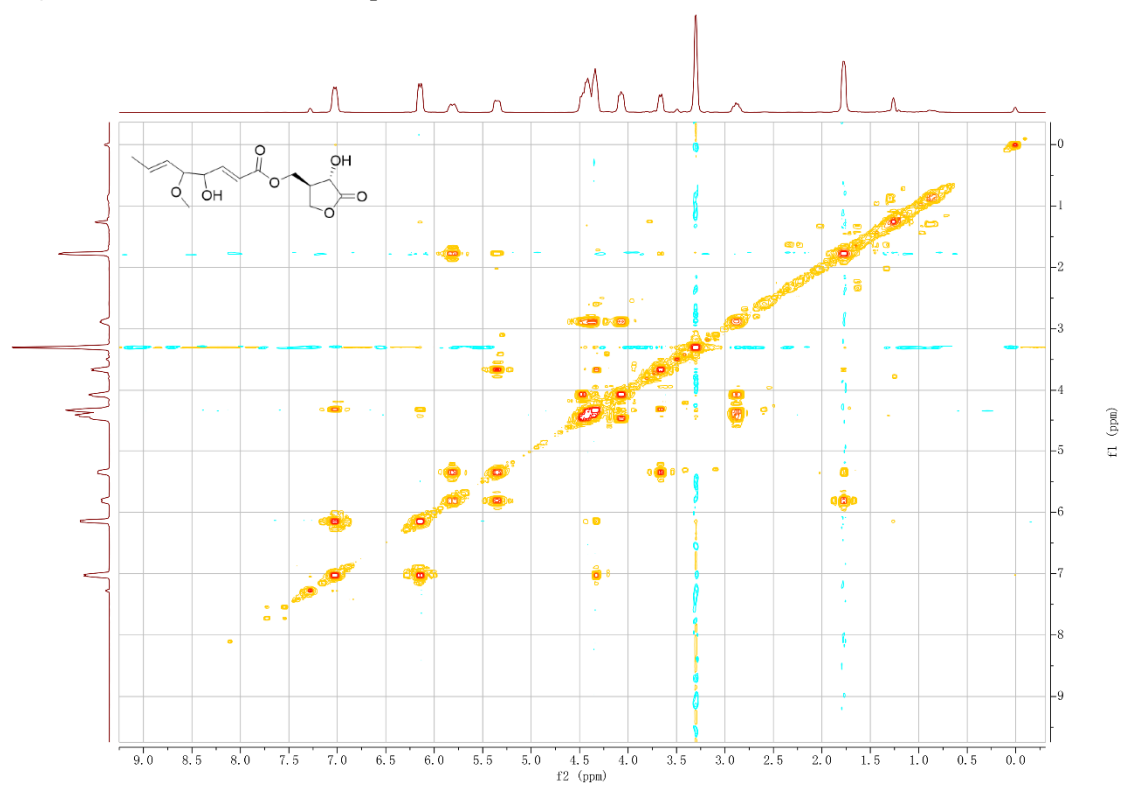

**Figure S26.** The NOESY spectrum of Tiuslactone D, **4**, in  $\text{CDCl}_3$

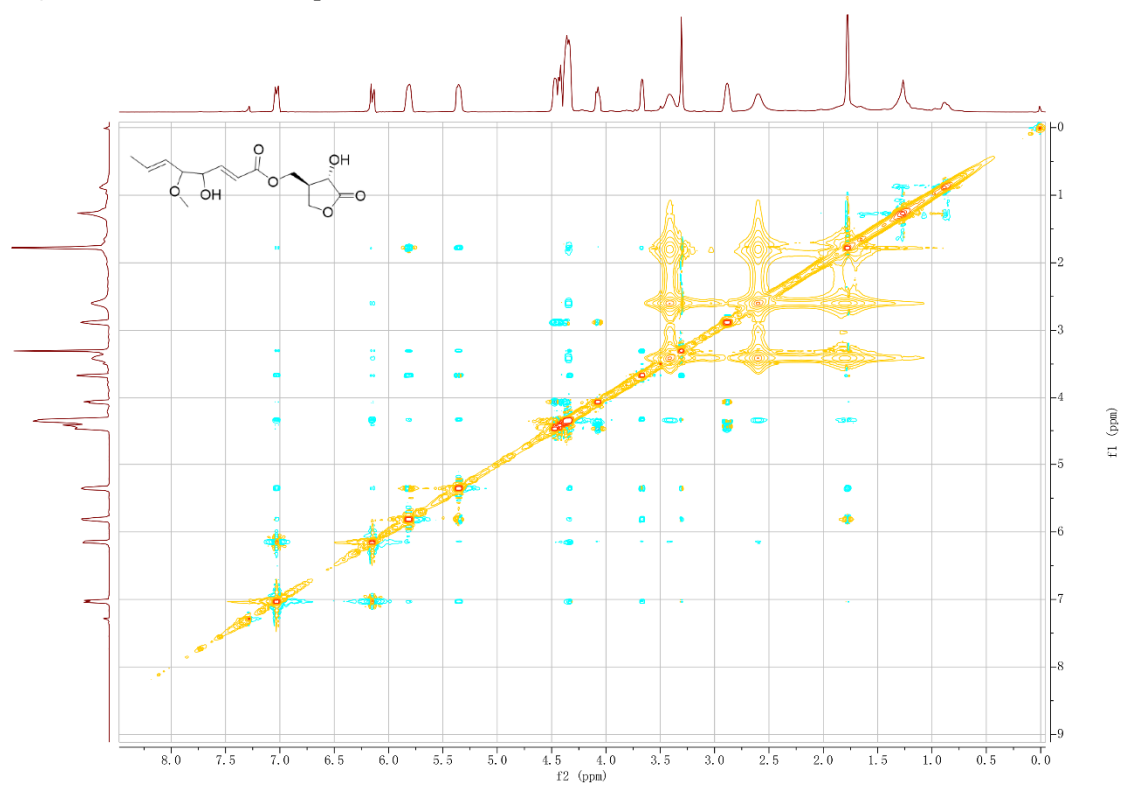

Figure S27. The HRESIMS spectrum of Tiuslactone D, 4

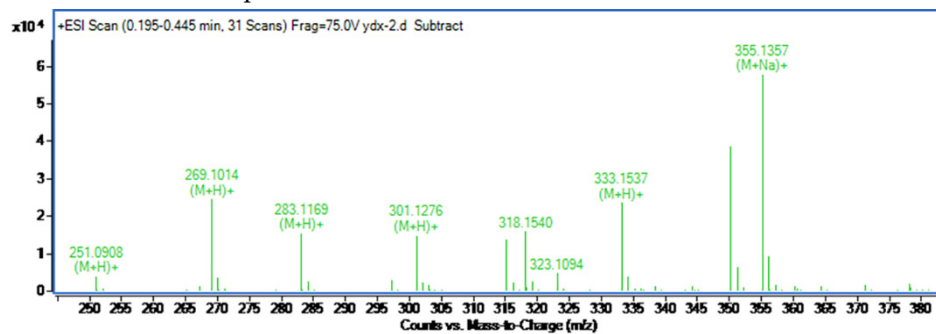

Figure S28. The  $^1\text{H}$ -NMR spectrum of Tiuslactone E, 5, in  $\text{CDCl}_3$

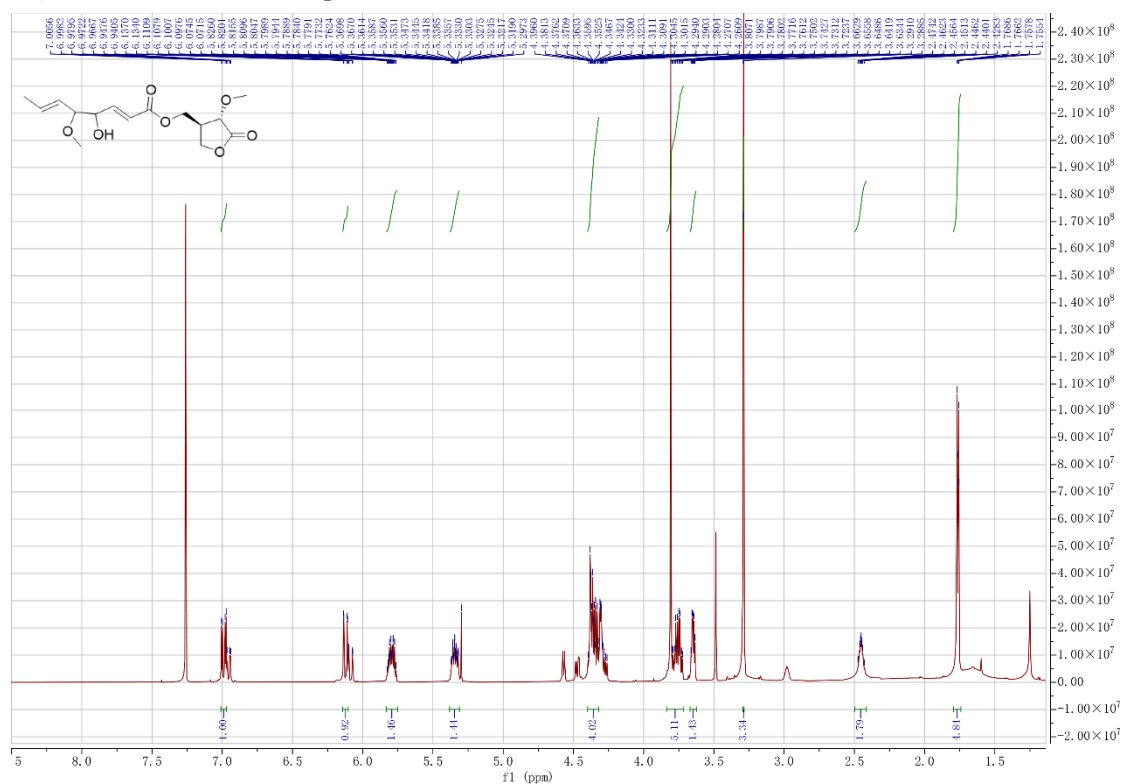



**Figure S29.** The  $^{13}\text{C}$ -NMR spectrum of Tiuslactone E, **5**, in  $\text{CDCl}_3$

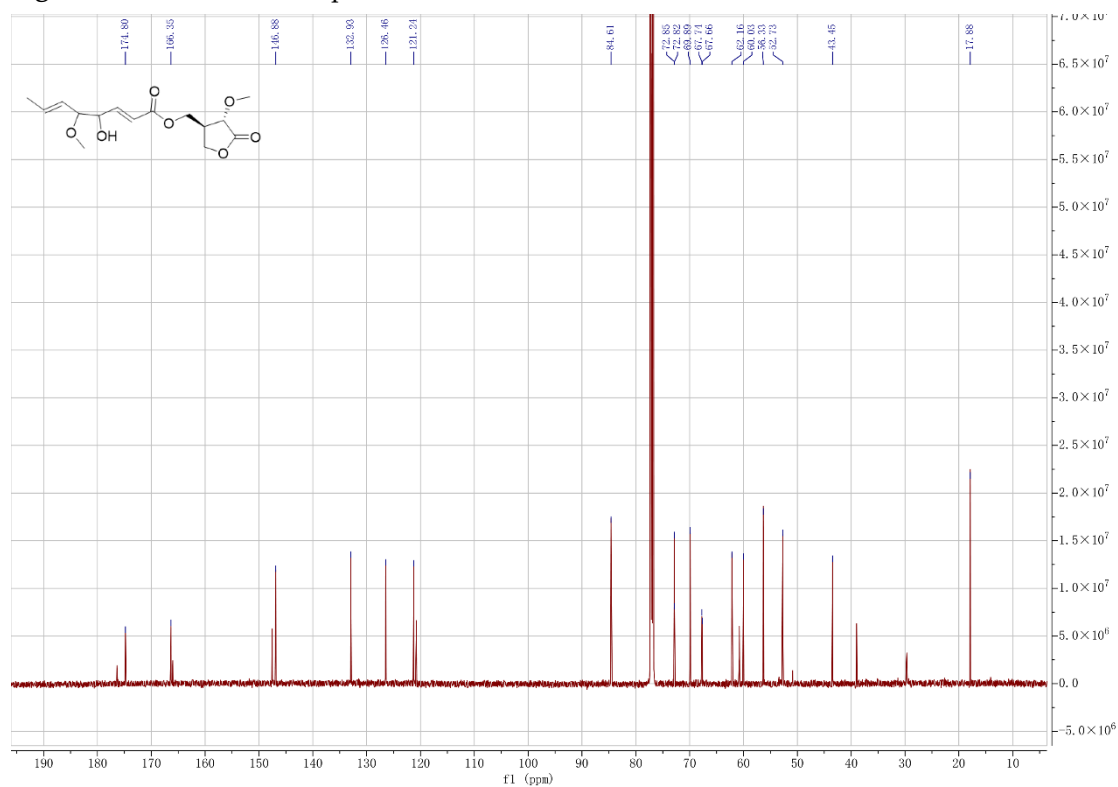

**Figure S30.** The HSQC spectrum of Tiuslactone E, **5**, in  $\text{CDCl}_3$

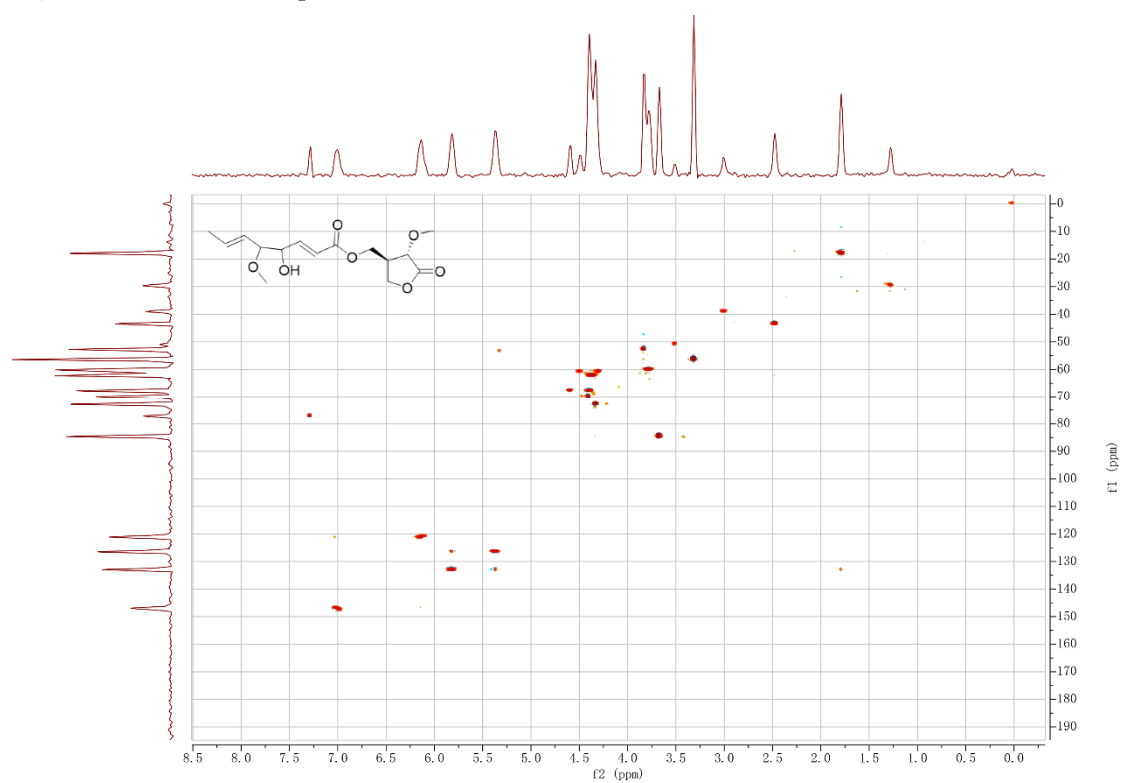

**Figure S31.** The HMBC spectrum of Tiuslactone E, **5**, in CDCl<sub>3</sub>

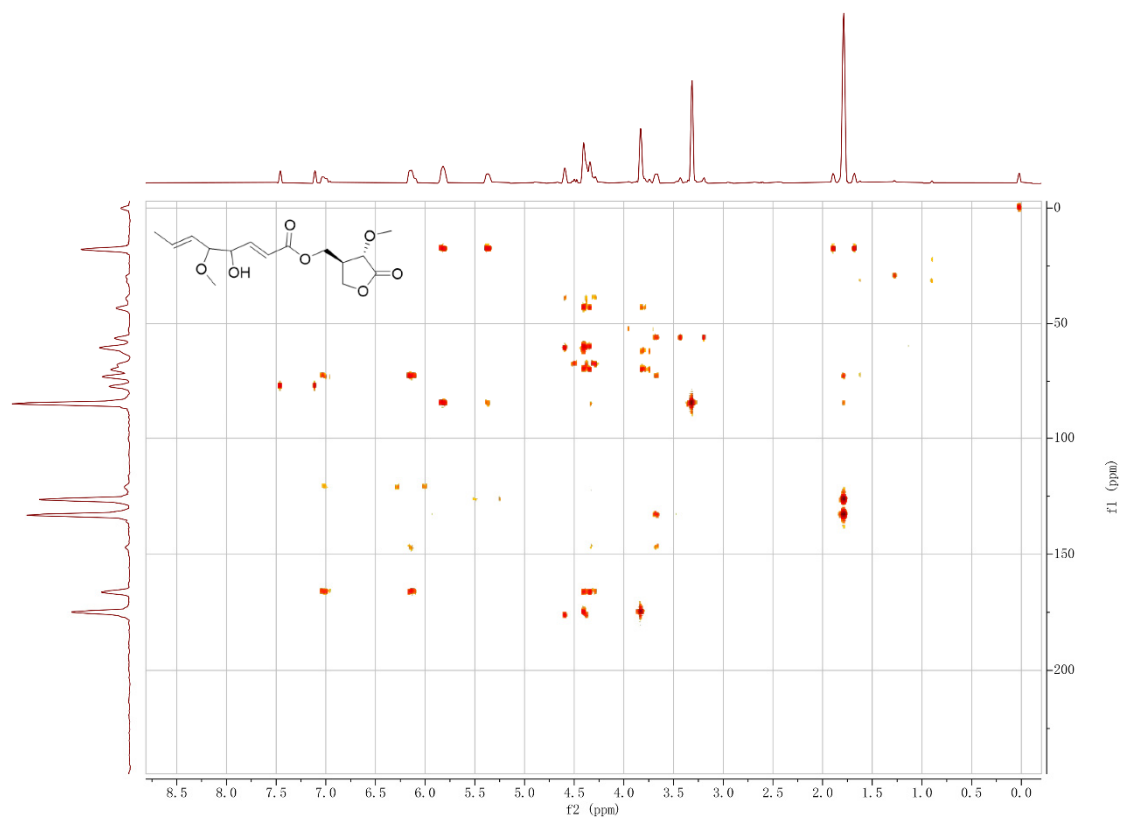

**Figure S32.** The <sup>1</sup>H-<sup>1</sup>H COSY spectrum of Tiuslactone E, **5**, in CDCl<sub>3</sub>

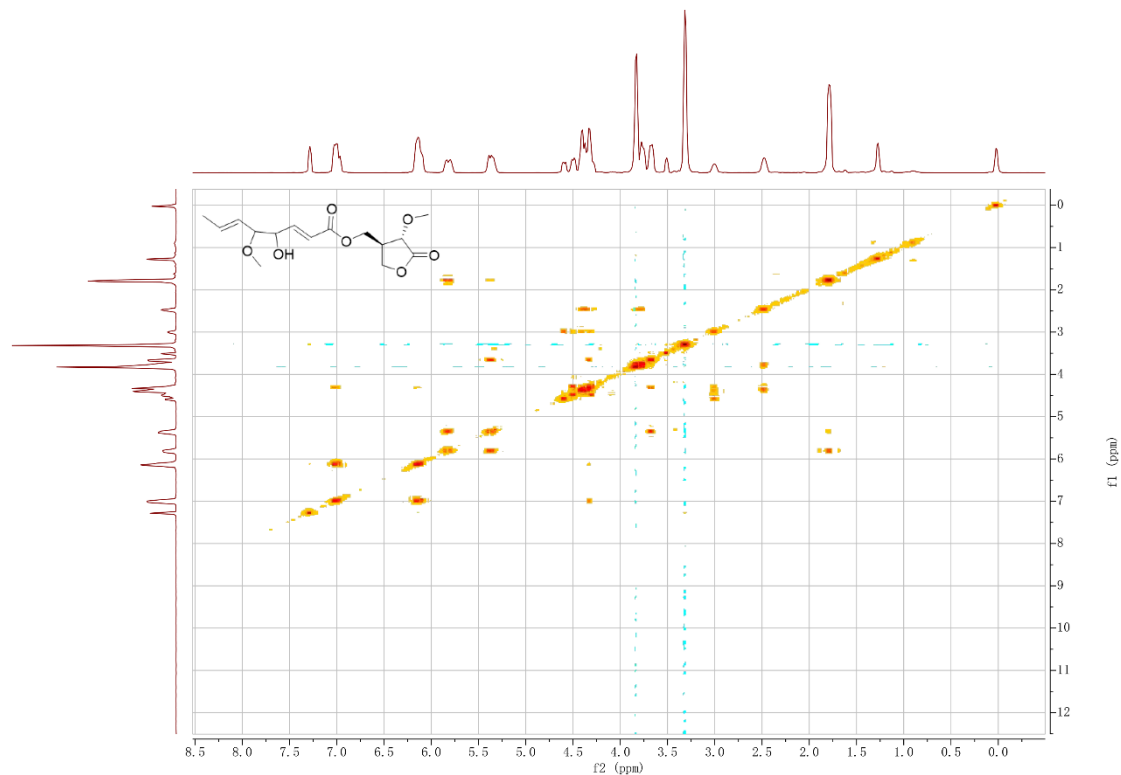

**Figure S33.** The NOESY spectrum of Tiuslactone E, **5**, in CDCl<sub>3</sub>

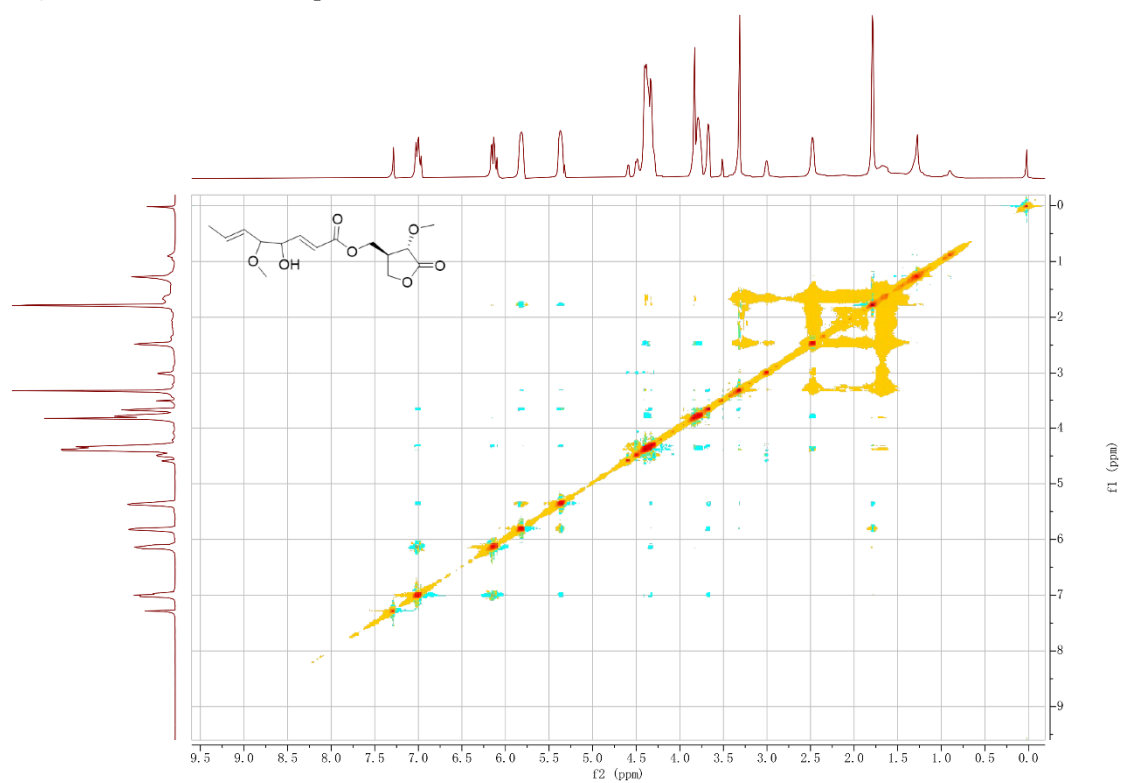

**Figure S34.** The HRESIMS spectrum of Tiuslactone E, **5**

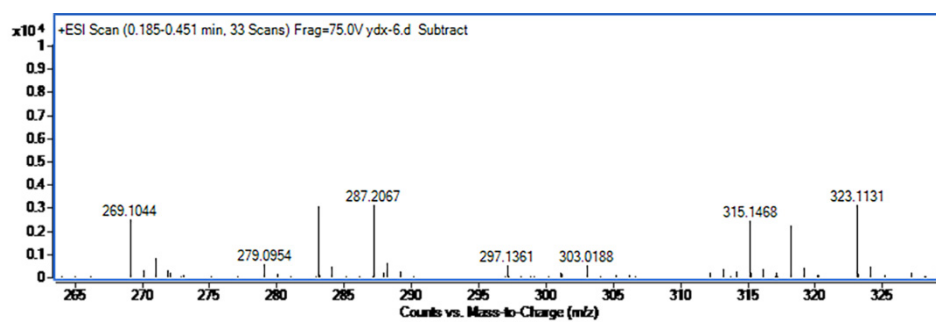

Figure S35. The  $^1\text{H}$ -NMR spectrum of Tiuslactone F, **6**, in  $\text{CDCl}_3$

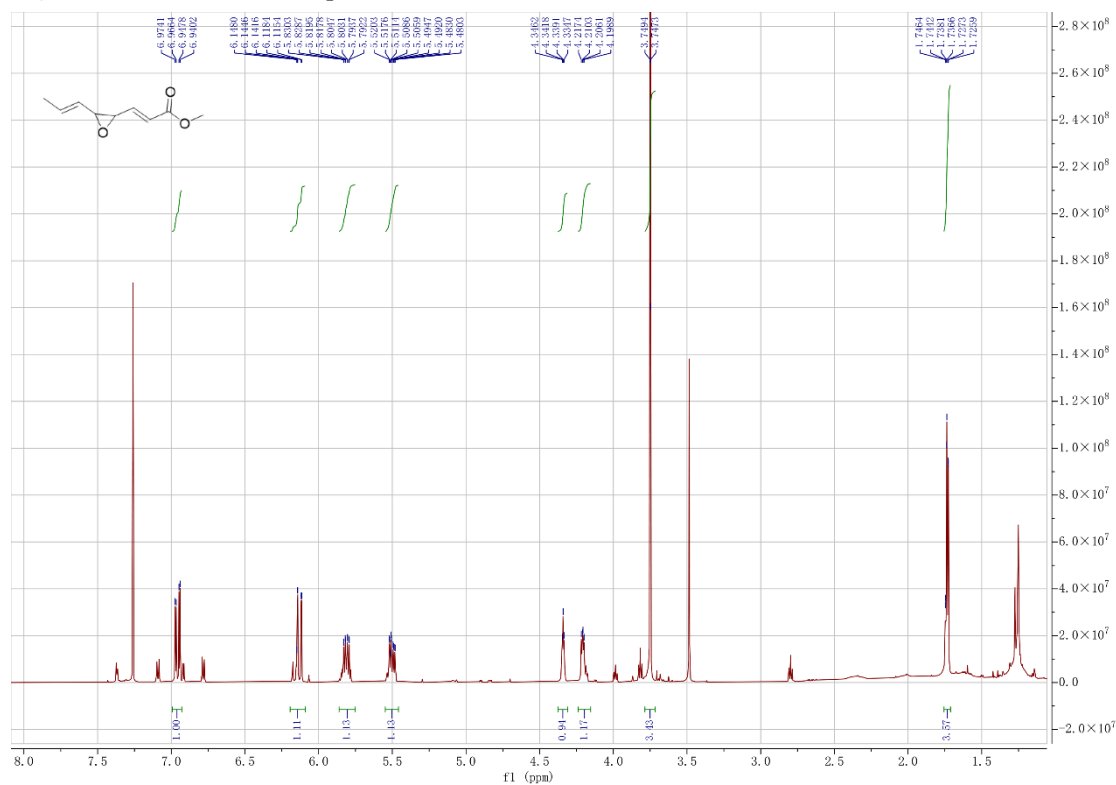

Figure S36. The  $^{13}\text{C}$ -NMR spectrum of Tiuslactone F, **6**, in  $\text{CDCl}_3$

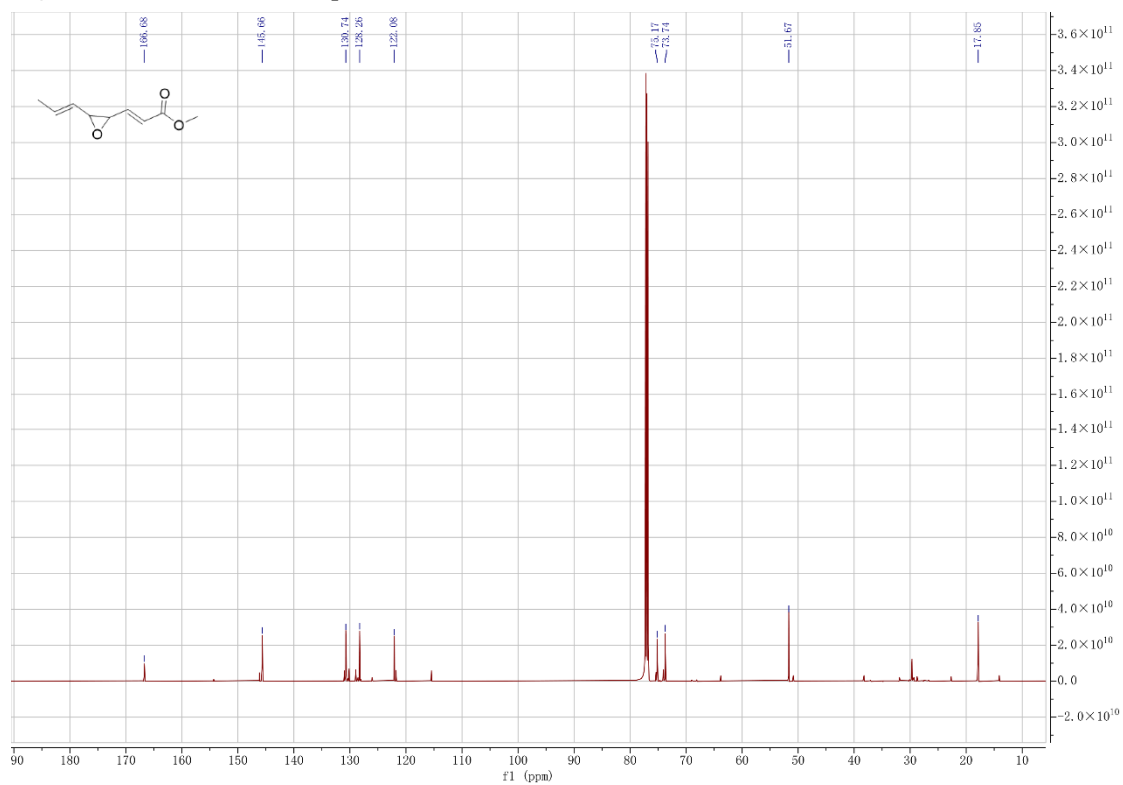

**Figure S37.** The HSQC spectrum of Tiuslactone F, **6**, in CDCL<sub>3</sub>

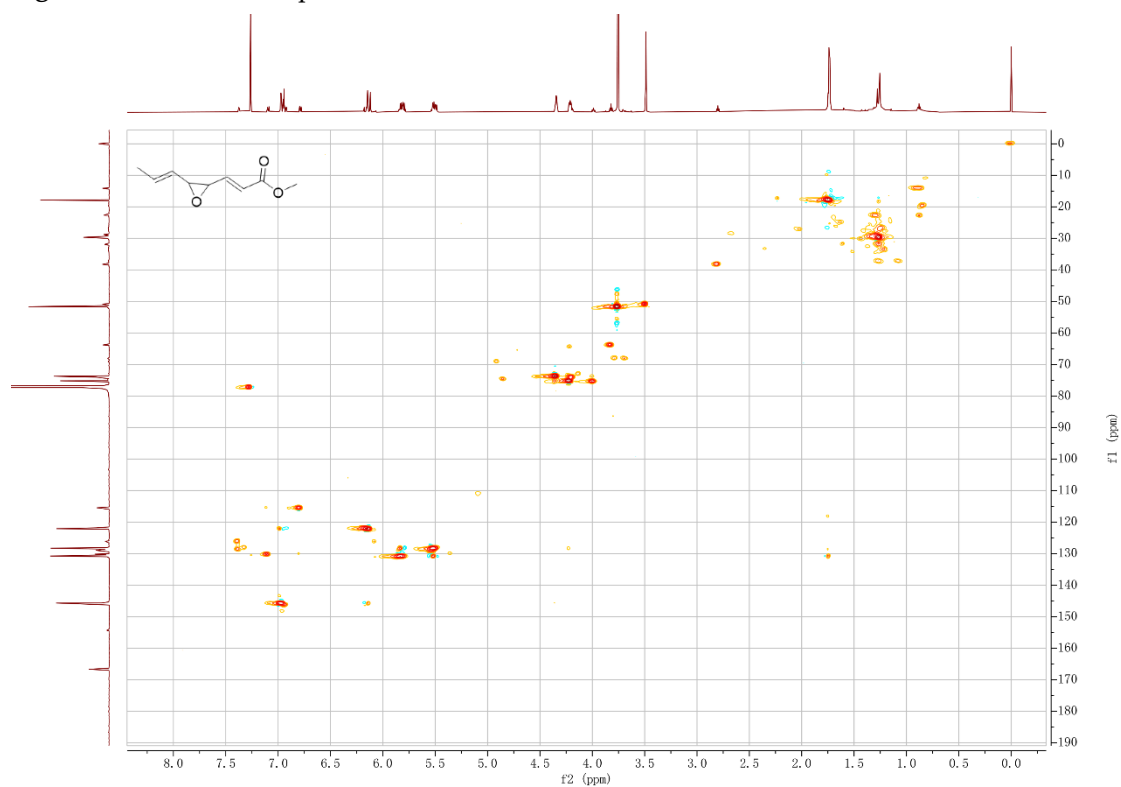

**Figure S38.** The HMBC spectrum of Tiuslactone F, **6**, in CDCL<sub>3</sub>

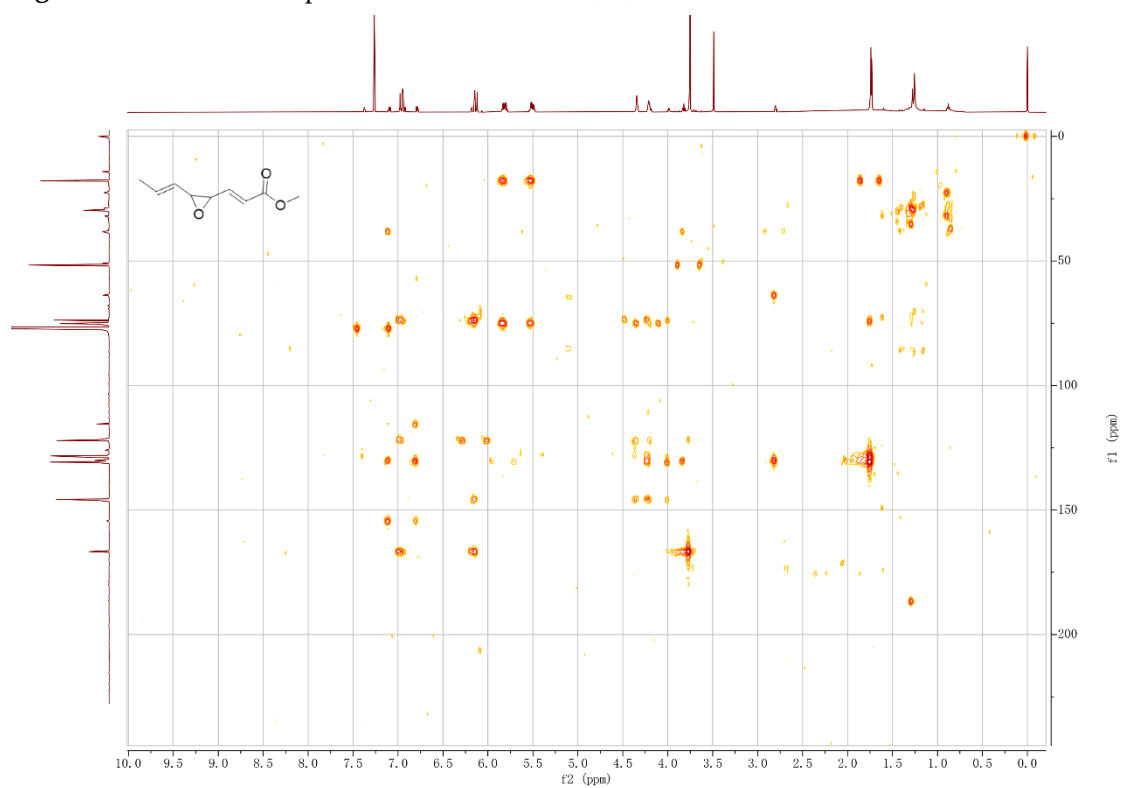

**Figure S39.** The  $^1\text{H}$ - $^1\text{H}$  COSY spectrum of Tiuslactone F, **6**, in  $\text{CDCl}_3$

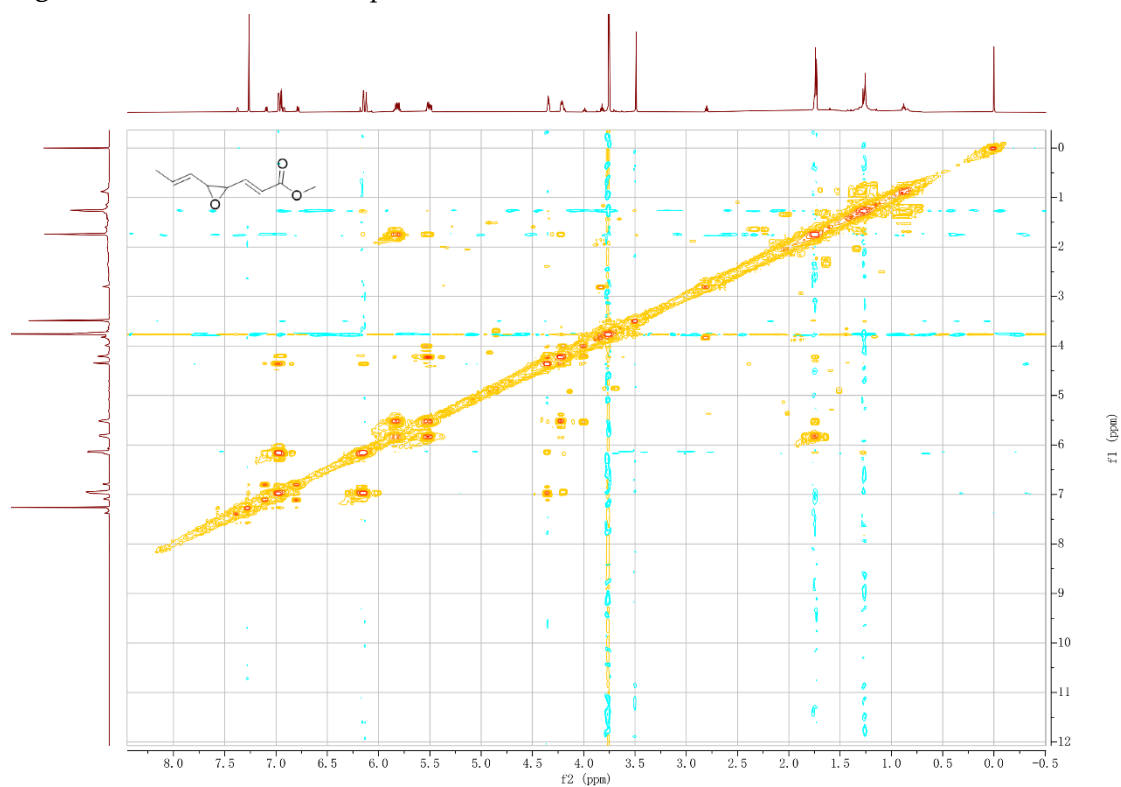

**Figure S40.** The NOESY spectrum of Tiuslactone F, **6**, in  $\text{CDCl}_3$

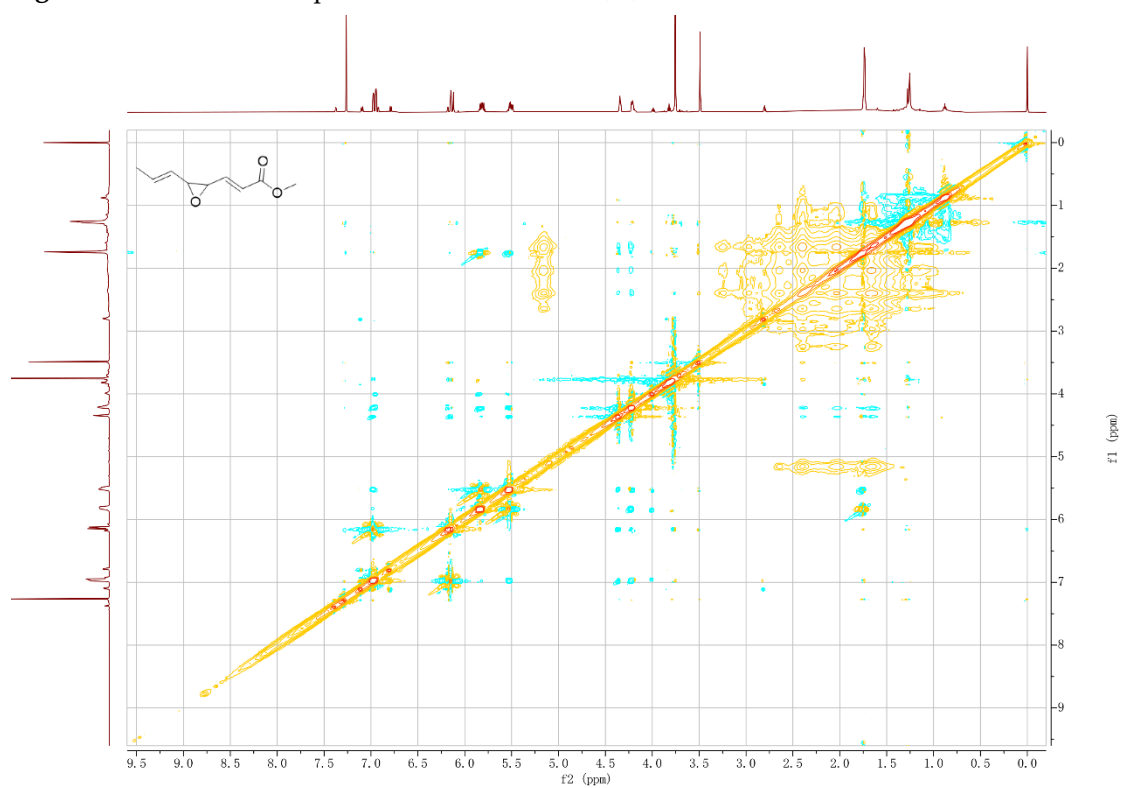

**Figure S41.** The HRESIMS spectrum of Tiuslactone F, **6**

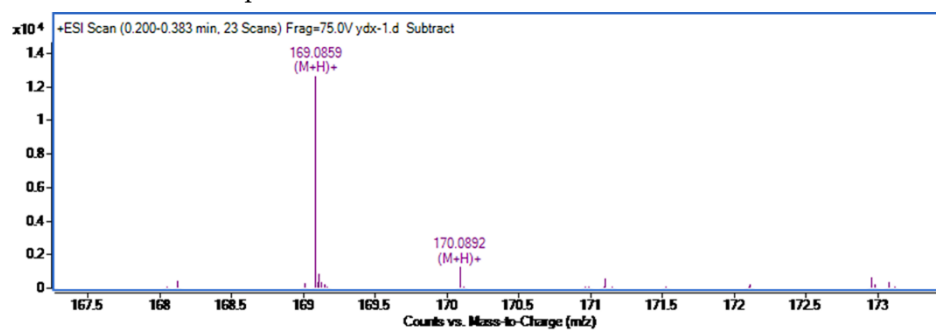

Supplement: s1 [file s1]
